# Supplementary material for: How Drug Use by French Elderly Patients Has Changed During the Last Decade
Source: Springer Nature journal article supplement (doi:10.1007/s40801-015-0041-6), 2015-10-09
Supplement: MOESM1 [file 24440408]

| Drugs repartition in 74 class | |
| --- | --- |
| 1 | AGENTS ACTING ON THE RENIN-ANGIOTENSIN SYSTEM |
| 2 | ANTIARRHYTHMICS, CLASS I AND III |
| 3 | ANTIBACTERIALS FOR SYSTEMIC USE |
| 4 | ANTI-DEMENTIA DRUGS |
| 5 | ANTIEPILEPTICS |
| 6 | ANTIINFLAMMATORY AND ANTIRHEUMATIC PRODUCTS, NON-STEROIDS |
| 7 | ANTINEOPLASTIC AGENTS |
| 8 | ANTIPARASITIC PRODUCTS, INSECTICIDES AND REPELLENTS |
| 9 | ANTI-PARKINSON DRUGS |
| 10 | ANTIPSYCHOTICS |
| 11 | ANXIOLYTICS |
| 12 | BENZODIAZEPINES DERIVATIVES |
| 13 | BENZODIAZEPINES RELATED DRUGS |
| 14 | BETA BLOCKING AGENTS |
| 15 | BLOOD GLUCOSE LOWERING DRUGS, EXCL. INSULINS |
| 16 | CALCIUM |
| 17 | CALCIUM CHANNEL BLOCKERS |
| 18 | CARDIAC GLYCOSIDES |
| 19 | CORTICOSTEROIDS FOR SYSTEMIC USE |
| 20 | DERMATOLOGICALS |
| 21 | DIRECT THROMBINE INHIBITORS |
| 22 | DIURETICS AND POTASSIUM-SPARING AGENTS IN COMBINATION |
| 23 | DRUGS FOR ACID RELATED DISORDERS (INCLUS IPP) |
| 24 | DRUGS FOR TREATMENT OF BONE DISEASES |
| 25 | FIBRATES |
| 26 | HEPARIN GROUP |
| 27 | HIGH-CEILING DIURETICS |
| 28 | HMG CoA REDUCTASE INHIBITORS |
| 29 | HYPNOTICS AND SEDATIVES NON BENZODIAZEPINE |
| 30 | IMMUNOSTIMULANTS |
| 31 | IMMUNOSUPPRESSANTS |
| 32 | INSULINS AND ANALOGUES |
| 33 | IRON PREPARATIONS |
| 34 | LAXATIVES |
| 35 | LOW-CEILING DIURETICS |
| 36 | OPHTHALMOLOGICALS |
| 37 | OPIOIDS ANALGESICS |
| 38 | OTHER ANTIANEMIC PREPARATIONS |
| 39 | OTHER ANTIHYPERTENSIVES |
| 40 | OTHER ANTITHROMBOTIC AGENTS |
| 41 | OTHER DIURETICS |
| 42 | OTHER NERVOUS SYSTEM DRUGS |
| 43 | OTHERS ALIMENTARY TRACT AND METABOLISM |
| 44 | OTHERS ANALGESICS |
| 45 | OTHERS ANTIDEPRESSANTS |
| 46 | OTHERS ANTIINFECTIVES FOR SYSTEMIC USE |
| 47 | OTHERS ANTIINFLAMMATORY AND ANTIRHEUMATIC PRODUCTS |
| 48 | OTHERS ANTINEOPLASTIC AND IMMUNOMODULATING AGENTS |
| 49 | OTHERS BLOOD AND BLOOD FORMING ORGANS |
| 50 | OTHERS CARDIOVASCULAR SYSTEM |
| 51 | OTHERS GENITO URINARY SYSTEM AND SEX HORMONES |
| 52 | OTHERS LIPID MODIFYING AGENTS |
| 53 | OTHERS MINERAL SUPPLEMENTS |
| 54 | OTHERS NERVOUS SYSTEM |
| 55 | OTHERS PSYCHOANALEPTICS |
| 56 | OTHERS SENSORY ORGANS |
| 57 | OTHERS SYSTEMIC HORMONAL PREPARATIONS, EXCL. SEX HORMONES AND INSULINS |
| 58 | PARACETAMOL |
| 59 | PERIPHERAL VASODILATORS |
| 60 | PLATELET AGGREGATION INHIBITORS EXCL HEPARIN |
| 61 | POTASSIUM |
| 62 | POTASSIUM-SPARING AGENTS |
| 63 | PROTEIN SUPPLEMENTS |
| 64 | RESPIRATORY SYSTEM |
| 65 | SELECTIVE SEROTONINE REUPTAKE INHIBITORS |
| 66 | SEX HORMONES AND MODULATORS OF THE GENITAL SYSTEM |
| 67 | THYROID THERAPY |
| 68 | UROLOGICALS |
| 69 | VACCINES |
| 70 | VASODILATORS USED IN CARDIAC DISEASES |
| 71 | VASOPROTECTIVES |
| 72 | VITAMIN B12 AND FOLIC ACID |
| 73 | VITAMIN K ANTAGONIST |
| 74 | VITAMINS |
